1  
2  
3  
4  
5  
6  
7  
8  
9  
10  
11  
12  
13  
14  
15  
16  
17  
18  
19  
20  
21  
22  
23  
24

**A novel microtubule nucleation pathway for meiotic spindle  
assembly in oocytes**

Pierre Romé and Hiroyuki Ohkura\*

Wellcome Centre for Cell Biology

School of Biological Sciences

University of Edinburgh

Edinburgh EH9 3BF, UK

\*to whom all correspondence should be addressed. [h.ohkura@ed.ac.uk](mailto:h.ohkura@ed.ac.uk), +44-131-650-7094

1 **Abstract**

2 The meiotic spindle in oocytes is assembled in the absence of centrosomes, the major  
3 microtubule nucleation sites in mitotic and male meiotic cells. A crucial, yet unresolved  
4 question in meiosis is how spindle microtubules are generated without centrosomes and  
5 only around chromosomes in the large volume of oocytes. Here we report a novel oocyte-  
6 specific microtubule nucleation pathway that is essential for assembling most spindle  
7 microtubules complementarily with the Augmin pathway, and sufficient for triggering  
8 microtubule assembly in oocytes. This pathway is mediated by the kinesin-6 Subito/MKlp2,  
9 which recruits the  $\gamma$ -tubulin complex to the spindle equator to nucleate microtubules in  
10 *Drosophila* oocytes. Away from chromosomes, Subito interaction with the  $\gamma$ -tubulin complex  
11 is suppressed by its N-terminal region to prevent ectopic microtubule assembly in oocytes.  
12 We further demonstrate that the Subito complex from ovaries can nucleate microtubules  
13 from pure tubulin dimers *in vitro*. Taken together, microtubule nucleation regulated by  
14 Subito drives spatially restricted spindle assembly in oocytes.

15

## 1 **Introduction**

2           Spatial and temporal regulation of microtubule nucleation is vital for the formation  
3 and maintenance of a functional spindle. In mitotic or male meiotic animal cells,  
4 centrosomes are the major microtubule nucleation sites, which appear to be central to define  
5 the position of the spindle formation and the spindle bipolarity. Despite the apparent central  
6 roles of centrosomes, the bipolar mitotic spindle can be formed in mitotic cells even when  
7 centrosomes are artificially inactivated (Khodjakov et al., 2000; Hinchcliffe et al., 2001).  
8 Moreover, centrosomes have been shown to be dispensable for the flies, as *Drosophila*  
9 without centrosomes can survive to the adult stage (Basto et al., 2006).

10           In most animals, female meiosis in oocytes is different from mitosis or male meiosis,  
11 as oocytes naturally lack centrosomes to assemble the meiotic spindle (McKim and  
12 Hawley, 1995; Karsenti and Vernos, 2001). The lack of centrosomes in oocytes poses two  
13 fundamental questions: how are spindle microtubules nucleated, and how is efficient  
14 nucleation spatially restricted to only around the chromosomes? A constantly high level of  
15 nucleation is essential for forming and maintaining the spindle, due to the intrinsically  
16 dynamic nature of spindle microtubules (Mitchison and Kirschner, 1984). In addition, as  
17 oocytes are exceptionally large in volume, it is crucial to spatially limit a high level of  
18 nucleation only to the vicinity of chromosomes.

19           In mitotic cells, centrosome-independent microtubule nucleation takes place  
20 randomly along the spindle microtubules (Mahoney et al., 2006). This nucleation has been  
21 shown to be mediated by a conserved 8-subunit complex called Augmin (Goshima et al.,  
22 2008; Meireles et al., 2009; Uehara et al., 2009; Kamasaki et al., 2013). Augmin sits on a  
23 pre-existing microtubule and recruits the  $\gamma$ -tubulin complex by direct interaction with one of  
24 the  $\gamma$ -tubulin subunits, NEDD1 (Grip71 in *Drosophila*) (Uehara et al., 2009; Chen et al.,  
25 2017). The  $\gamma$ -tubulin complex then nucleates a new microtubule from a pre-existing one,  
26 leading to "microtubule amplification" which exponentially increases the number of  
27 microtubules (Goshima and Kimura, 2010). In mitotic cells, a loss of either Augmin or  
28 Grip71 leads to the same dramatic decrease in the spindle microtubule density (Meireles et

1 al., 2009; Reschen et al., 2012), demonstrating that this microtubule amplification pathway is  
2 responsible for the majority of microtubule assembly even in the presence of centrosomes.  
3 Furthermore, loss of Augmin leads to severe reduction of spindle microtubules in mitotic  
4 cells which lack centrosomes (Goshima et al., 2008; Meireles et al., 2009; Wainman et al.,  
5 2009), showing that Augmin-mediated microtubule nucleation accounts for the assembly of  
6 virtually all centrosome-independent spindle microtubules in mitosis.

7 Surprisingly, a robust bipolar spindle can be formed without the Augmin complex in  
8 *Drosophila* oocytes that naturally lack centrosomes (Meireles et al., 2009). This  
9 demonstrates that oocytes have an alternative pathway which can assemble spindle  
10 microtubules without both Augmin and centrosomes. In stark contrast to the loss of Augmin,  
11 removal of the  $\gamma$ -tubulin subunit Grip71 in oocytes strongly reduces spindle microtubules  
12 (Reschen et al., 2012). This paradoxical result strongly suggests the existence of another  
13 nucleation pathway specific to oocytes for assembling a meiotic spindle.

14 Here we report a novel microtubule nucleation pathway in oocytes, which is mediated  
15 by a kinesin-6, Subito/MKlp2. We show that Subito and Augmin recruit Grip71 to the spindle  
16 equator and poles, respectively. These two pathways act complementarily to assemble  
17 most of the spindle microtubules in oocytes. Furthermore, the N-terminal region of Subito is  
18 important to spatially restrict the spindle microtubule nucleation only to the vicinity of meiotic  
19 chromosomes. Therefore, this novel nucleation pathway is central for both assembling a  
20 meiotic spindle around chromosomes and preventing ectopic microtubule nucleation in the  
21 large volume of an oocyte.

22

## 1 **Results**

2

### 3 **Grip71/NEDD1 is recruited to the spindle equator in the absence of Augmin in oocytes**

4         In mitotic *Drosophila* cells, few microtubules are assembled in the absence of both  
5 centrosomes and Augmin (Goshima et al., 2008; Meireles et al., 2009; Wainman et al.,  
6 2009). In contrast, in *Drosophila* oocytes which naturally lacks centrosomes, we have  
7 previously shown that spindle microtubules are robustly assembled in the absence of  
8 Augmin (Meireles et al., 2009). This difference points to the presence of a yet unknown,  
9 oocyte-specific microtubule assembly pathway.

10         Spindle microtubule assembly in oocytes is greatly reduced in the absence of the  $\gamma$ -  
11 tubulin subunit Grip71/NEDD1 (Reschen et al., 2012), suggesting that this new oocyte-  
12 specific pathway largely depends on Grip71. Grip71/NEDD1 is a  $\gamma$ -tubulin subunit through  
13 which Augmin recruits the  $\gamma$ -tubulin complex to existing microtubules (Vérollet et al., 2006;  
14 Luders et al., 2006; Zhu et al., 2008; Uehara et al., 2009; Chen et al., 2017). In mitosis,  
15 localisation of  $\gamma$ -tubulin and Grip71 on the spindle microtubules depends entirely on Augmin  
16 (Goshima et al., 2008; Zhu et al., 2008, Wainman et al., 2009). We hypothesised that  
17 oocytes have an alternative Augmin-independent pathway which recruits the  $\gamma$ -tubulin  
18 complex onto the spindle microtubules through Grip71.

19         To test this hypothesis, an antibody was raised against Grip71(**Fig S1**) and used to  
20 immunostain mature wild-type oocytes which naturally arrest in metaphase I. We found that  
21 Grip71 is concentrated at the spindle poles and equator (**Fig 1**). Next, to test whether this  
22 localisation depends on Augmin, Grip71 was immunostained in oocytes of a null mutant of  
23 the essential Augmin subunit Wac (Meireles et al., 2009). Concentration of Grip71 at the  
24 spindle poles was greatly reduced in *wac* mutant oocytes in comparison with wild type, but  
25 Grip71 localisation to the spindle equator was not affected (**Fig 1**). This Augmin-dependent  
26 Grip71 localisation to the spindle poles is consistent with our previous observation of Augmin  
27 localisation to the poles and its function to promote microtubule assembly near the poles in  
28 oocytes (Meireles et al., 2009; Colombie et al., 2013). In contrast, the localisation of Grip71

1 to the spindle equator in oocytes is independent of Augmin, which can explain why oocytes  
2 robustly assemble spindle microtubules without Augmin, but fail to do so without Grip71  
3 (Meireles et al., 2009; Reschen et al., 2012).

4

#### 5 **The *Drosophila* MKlp2, Subito, recruits Grip71 to the spindle equator**

6 To understand the molecular mechanism of this novel microtubule assembly  
7 pathway, we sought to identify a protein which recruits Grip71 to the spindle equator. We  
8 predict that such a protein should (1) colocalise with Grip71 to the spindle equator in  
9 oocytes, (2) physically interact with the Grip71/ $\gamma$ -tubulin complex directly or indirectly, and  
10 (3) be required for Grip71 localisation to the spindle equator but not the spindle poles. We  
11 considered Subito (the orthologue of mammalian MKlp2, a kinesin-6) to be a good  
12 candidate, as it was previously shown to localise to the spindle equator and have an  
13 important role in the integrity of the spindle equator (Jang et al., 2005).

14 To test whether Subito colocalises with Grip71 to the spindle equator, mature  
15 oocytes were co-immunostained for Subito, Grip71 and  $\alpha$ -tubulin (**Fig 2**). Subito and Grip71  
16 showed nearly identical localisation patterns in the spindle equator, while  $\alpha$ -tubulin showed a  
17 distinct pattern from them (**Fig 2A**). This was confirmed by intensity measurements along a  
18 cross-section of a spindle (**Fig 2A**). To test physical interaction between Subito and Grip71,  
19 GFP-Subito expressed in ovaries was immunoprecipitated for analysis by western blot.  
20 Grip71 and  $\gamma$ -tubulin were both co-immunoprecipitated with GFP-Subito from a *Drosophila*  
21 ovary extract (**Fig 2B**), demonstrating that Subito interacts with Grip71 and  $\gamma$ -tubulin.

22 To test whether Grip71 localisation depends on Subito, mature oocytes expressing  
23 short hairpin RNA (shRNA) against *subito* were immunostained for Subito, Grip71 and  $\alpha$ -  
24 tubulin (**Fig 2C**). Subito signals were dramatically reduced, confirming the specificity of the  
25 anti-Subito antibody and the effectiveness of RNAi (**Fig 2C-E**). Strikingly, Grip71 localisation  
26 to the spindle equator was lost (**Fig 2C,E**). In contrast, Grip71 localisation at the poles was  
27 still observed, although in fewer oocytes (**Fig 2C,E**). This shows that Subito is essential for  
28 Grip71 localisation to the spindle equator, but largely dispensable for its localisation to the

1 poles. Taken together, we conclude that Subito recruits Grip71 to the spindle equator in  
2 oocytes.

3

#### 4 **Subito and Augmin complement each other to generate spindle microtubules**

5 It was previously shown that the total amount of spindle microtubules was not  
6 significantly reduced in a null mutant of either Subito or the Augmin subunit Wac in oocytes  
7 (Giunta et al., 2002; Jang et al., 2005; Colombié et al., 2008; Meireles et al., 2009). We  
8 hypothesised that these two pathways may act complementarily to assemble spindle  
9 microtubules. To test this, both Subito and Wac were simultaneously depleted from oocytes  
10 by expressing short hairpin RNA (shRNA) against Subito in ovaries of the *wac* null mutant.  
11 Immunostaining showed that a single depletion of Subito or Wac did not reduce the total  
12 amount of spindle microtubules (**Fig 3C**), as previously reported (Giunta et al., 2002; Jang et  
13 al., 2005; Colombie et al., 2008; Meireles et al., 2009). In contrast, simultaneous depletion  
14 of Subito and Wac led to a dramatic reduction of spindle microtubules and often thinner  
15 spindles (**Fig 3A,B**). This phenotype is reminiscent of the *grip71* RNAi or null mutant  
16 phenotype (**Fig 3A,B**; Reschen et al., 2012), suggesting that Grip71 recruitment to the  
17 meiotic spindle depends entirely on Subito and Wac. Indeed, immunostaining showed that  
18 Grip71 fails to localise to the spindle in oocytes co-depleted of Subito and Wac (**Fig 3A,C**).  
19 Therefore, we conclude that Subito and Augmin mediate two complementary pathways  
20 which recruit Grip71/ $\gamma$ -tubulin to assemble most spindle microtubules in oocytes.

21

#### 22 **Grip71 mediates ectopic microtubule assembly induced by Subito lacking the N-** 23 **terminal region**

24 It was previously shown that over-expression of Subito lacking its N-terminal non-  
25 motor region in oocytes can induce ectopic spindles in the cytoplasm, away from the  
26 chromosomes (Jang et al., 2007; **Fig 4A**). Originally it was thought that mis-regulated  
27 Subito bundles cytoplasmic microtubules, resulting in the formation of ectopic spindles (Jang  
28 et al., 2007). However, an alternative interpretation is that mis-regulated Subito ectopically

1 recruits the  $\gamma$ -tubulin complex in the ooplasm and nucleates microtubules, independently of  
2 chromosomes. If this interpretation is correct, we predict that (1) Grip71 is recruited to the  
3 ectopic sites of microtubule assembly and that (2) the formation of the ectopic spindles  
4 depends on Grip71.

5 To test whether Grip71 is recruited to ectopic spindles, we immunostained Grip71 in  
6 oocytes expressing Subito lacking the N-terminal region (Subito $\Delta$ N). As previously shown  
7 (Jang et al., 2007), Subito $\Delta$ N not only localised to the equatorial region of the meiotic spindle  
8 associated with chromosomes, but was also concentrated on ectopic spindles in oocytes.  
9 Importantly, Grip71 was recruited to ectopic spindles in addition to the equatorial region of  
10 the meiotic spindle (**Fig 4A**).

11 Next, to determine whether the formation of the ectopic spindles depends on Grip71,  
12 Grip71 was depleted by RNAi from oocytes expressing Subito $\Delta$ N (**Fig 4B**). Over 80% of  
13 oocytes expressing Subito $\Delta$ N and control shRNA form ectopic spindles. In contrast, when  
14 Grip71 is depleted, about a half of the oocytes expressing Subito $\Delta$ N failed to form ectopic  
15 spindles. To assess microtubule nucleation more accurately, microtubule regrowth  
16 experiments were carried out using cold treatment followed by warming (**Fig 4C**). Cold  
17 treatment abolished both chromosome-associated spindles and ectopic microtubules. Two  
18 minutes after warming, ~40% of control oocytes displayed ectopic microtubule arrays  
19 associated with Grip71 foci, while fewer Grip71-depleted oocytes (~20%) displayed ectopic  
20 arrays (**Fig 4D**). Furthermore, these fewer ectopic arrays formed in Grip71-depleted oocytes  
21 showed substantially lower tubulin intensity than the control (**Fig 4E**). Fewer and weaker  
22 microtubule arrays in Grip71-depleted oocytes indicates that ectopic microtubule assembly  
23 by Subito $\Delta$ N is largely dependent on Grip71. These results support our hypothesis that  
24 Subito $\Delta$ N induces ectopic microtubule nucleation through recruiting the  $\gamma$ -tubulin complex in  
25 the ooplasm.

26

27 **Subito and its associated proteins can induce microtubule nucleation *in vitro***



1           Our genetic and cytological studies support the hypothesis that Subito recruits  $\gamma$ -  
2 tubulin through Grip71 to nucleate spindle microtubules. To biochemically demonstrate that  
3 Subito and its associated proteins can nucleate microtubules, we set up the following *in vitro*  
4 assay using GFP-tagged Subito immunoprecipitated from ovaries incubated with pure pig  
5 brain  $\alpha/\beta$ -tubulin dimer (**Fig 5A**).

6           Ovaries of flies expressing GFP-Subito (Subito WT) or GFP-Subito $\Delta$ N were used to  
7 immunoprecipitate each Subito variant using beads coupled with an anti-GFP antibody. In  
8 addition to GFP-tagged proteins, those oocytes also expressed shRNA against either *Grip71*  
9 or *white* (control). As negative and positive controls, we used GFP alone or GFP-Grip71  
10 immunoprecipitated from corresponding ovaries. These beads were then incubated with  
11 pure  $\alpha/\beta$ -tubulin dimer (18% of which were rhodamine-labelled) and GTP. After 3 minutes at  
12 37°C, the reaction was fixed and observed under a fluorescence microscope.

13           As expected, the GFP-beads were associated with few microtubules, while the GFP-  
14 Grip71 beads were associated with an aster-like microtubule array (**Fig 5B,C**). Strikingly,  
15 GFP-Subito $\Delta$ N beads from control RNAi oocytes were associated with an aster-like  
16 microtubule array to a similar extent to GFP-Grip71 beads (**Fig 5B,C**). Interestingly, GFP-  
17 Subito WT beads from control RNAi oocytes were also associated with some microtubules  
18 but to a much lesser extent than GFP-Subito $\Delta$ N beads (**Fig 5B,C**). This stronger *in vitro*  
19 nucleation activity of GFP-Subito $\Delta$ N is consistent with its ability to induce ectopic  
20 microtubules *in vivo*.

21           It is formally possible that microtubules around the GFP-Subito $\Delta$ N beads were  
22 spontaneously nucleated in the solution and then captured by the beads, rather than  
23 nucleated by the beads. To exclude this possibility, we counted the number of free  
24 microtubules not associated with beads (**Fig S2**). If microtubules were spontaneously  
25 nucleated and then captured, fewer free microtubules should be observed in the  
26 experiments using GFP-Subito $\Delta$ N beads than with GFP-beads. In contrast, if GFP-  
27 Subito $\Delta$ N beads nucleated microtubules (some of which were detached), more free  
28 microtubules should be observed than GFP-beads. Indeed, we observed many more free

1 microtubules in the experiment using GFP-Subito $\Delta$ N beads than using GFP-beads (**Fig S2**).  
2 This confirmed that GFP-Subito $\Delta$ N beads induced microtubule nucleation, rather than simply  
3 capturing spontaneously nucleated microtubules.

4 To further confirm that these microtubule asters formed around the GFP-Subito $\Delta$ N or  
5 GFP-Subito WT beads were due to microtubule nucleation, we tested whether the  $\gamma$ -tubulin  
6 subunit Grip71 is required for aster formation. GFP-Subito $\Delta$ N or GFP-Subito WT was  
7 immunoprecipitated from ovaries simultaneously expressing GFP-Subito $\Delta$ N and shRNA  
8 against Grip71. None or a few microtubules were assembled around the GFP-Subito $\Delta$ N or  
9 GFP-Subito WT beads from Grip71-depleted oocytes (**Fig 5B,C**). These results  
10 demonstrate that microtubule assembly mediated by the GFP-Subito $\Delta$ N or GFP-Subito WT  
11 beads depends on Grip71. Therefore, we conclude that Subito and its associated proteins  
12 can nucleate microtubules from pure  $\alpha/\beta$ -tubulin *in vitro*, and that this nucleation activity is  
13 inhibited by the N-terminal region of Subito.

14

#### 15 **Subito interaction with the $\gamma$ -tubulin complex is suppressed by its N-terminal region**

16 Genetic and cytological analysis in this study showed that the Subito N-terminal  
17 region suppresses the Subito activity and prevents ectopic microtubule nucleation in  
18 oocytes. Furthermore, the N-terminal region suppresses *in vitro* microtubule nucleation  
19 activity of Subito. To gain a mechanistic insight, we tested whether the interaction between  
20 Subito and the  $\gamma$ -tubulin complex is regulated by the N-terminal region. Proteins co-  
21 immunoprecipitated with GFP-Subito or GFP-Subito $\Delta$ N were analysed by immunoblot using  
22 Grip71 and  $\gamma$ -tubulin antibodies (**Fig 6**).

23 Strikingly, we found that Grip71 and  $\gamma$ -tubulin were co-immunoprecipitated with GFP-  
24 Subito $\Delta$ N much more efficiently than with GFP-Subito (**Fig 6**). This demonstrated that the  
25 N-terminal region suppresses the interaction between Subito and the  $\gamma$ -tubulin complex,  
26 which explains why Subito $\Delta$ N is hyperactive in nucleating microtubules *in vivo* and *in vitro*.  
27 When Grip71 was depleted from ovaries,  $\gamma$ -tubulin was not co-immunoprecipitated with  
28 either GFP-Subito $\Delta$ N or Subito, confirming that Grip71 mediates the interaction between

1 Subito and the  $\gamma$ -tubulin complex (**Fig 6**). These results show that the N-terminal region  
2 inhibits the interaction between Subito and Grip71, hence between Subito and the  $\gamma$ -tubulin  
3 complex.

4

## 1 Discussion

2 Our *in vivo* and *in vitro* analysis uncovered a novel microtubule nucleation pathway  
3 specific to oocytes, which is mediated by the conserved kinesin-6 Subito/MKlp2. Subito  
4 recruits the  $\gamma$ -tubulin complex to the spindle equator via Grip71/NEDD1, acting  
5 complementarily to Augmin which fulfils this role at the spindle poles. A loss of either  
6 pathway does not reduce bulk spindle microtubules, but together they are essential for the  
7 assembly of most spindle microtubules in oocytes. We demonstrated that Subito can  
8 interact with the  $\gamma$ -tubulin complex through Grip71 and induce microtubule nucleation from  
9 pure tubulin dimers *in vitro*. Interestingly the N-terminal region of Subito suppresses its  
10 interaction with the  $\gamma$ -tubulin complex, and prevents ectopic assembly of microtubules in  
11 oocytes. Therefore, this novel microtubule nucleation pathway is central to assemble the  
12 meiotic spindle around chromosomes and, as importantly, to suppress ectopic microtubule  
13 nucleation in the ooplasm.

14 We propose the following model of spatially restricted spindle assembly in *Drosophila*  
15 oocytes (**Fig 7**). In the vicinity of chromosomes, Subito binds to microtubules in the spindle  
16 equator and recruits the  $\gamma$ -tubulin complex through Grip71 to nucleate new microtubules. In  
17 the same manner, Augmin localises to the spindle poles where it nucleates microtubules.  
18 Away from chromosomes, the N-terminal region of Subito suppresses its interaction with the  
19  $\gamma$ -tubulin complex and therefore prevents ectopic microtubule nucleation.

20 Taking advantage of *Drosophila* oocytes, we combined genetic, cytological and  
21 biochemical approaches to uncover a novel oocyte-specific microtubule nucleation pathway.  
22 Unique features of oocytes, such as lack of centrosomes and a large volume, are also  
23 characteristics of oocytes from other species including humans. Furthermore, all proteins  
24 mentioned here, such as Subito/MKlp2, Grip71/NEDD1, Augmin and the  $\gamma$ -tubulin complex,  
25 are widely conserved (Jang et al., 2005; Haren et al., 2006; Lüders et al., 2006; Uehara et  
26 al., 2009; Lawo et al., 2009; Kollman et al., 2011; Teixidó-Travesa et al., 2012). Therefore, a  
27 similar mechanism to this novel nucleation pathway is likely to be operating in oocytes of  
28 other species to assemble the meiotic acentrosomal spindle.

1           Subito provides the first example of a kinesin to recruit a microtubule nucleator. As a  
2 kinesin, Subito also binds to microtubules. Thus, by combining microtubule binding and  
3 nucleation activities, it could locally increase the number of microtubules in an exponential  
4 manner to trigger rapid assembly of a very dense microtubule network (which is called  
5 microtubule amplification; Zhu et al., 2008; Goshima et al., 2010). Augmin was the only  
6 previously known factor which mediates microtubule amplification for spindle assembly  
7 (Meunier and Vernos, 2016; Prosser and Pelletier, 2017). In oocytes, we showed that the  
8 Subito pathway acts complementarily to Augmin pathway to assemble most of the spindle  
9 microtubules in oocytes. In mitosis, however, Subito microtubule nucleation pathway seems  
10 to be inactive or negligible, as very few microtubules are assembled in the absence of both  
11 centrosomes and Augmin (Goshima et al., 2008; Meireles et al., 2009; Wainman et al.,  
12 2009). Moreover, Subito depletion does not result in significant spindle defect in mitotic cells  
13 lacking centrosomes (Moutinho-Pereira et al., 2013). Therefore, this new role of Subito in  
14 microtubule nucleation appears to be specific to oocytes.

15           During animal mitosis, centrosomes are major microtubule nucleating sites (Prosser  
16 and Pelletier, 2017) and Augmin nucleates randomly along the spindle (Goshima et al.,  
17 2008). Based on our findings, we hypothesise that the absence of the centrosomal activity  
18 in oocytes is compensated by two oocyte-specific adaptations of Augmin and Subito. Firstly,  
19 oocyte-specific localisation of Augmin at the spindle poles compensates for the absence of  
20 nucleation activity of centrosomes from the poles (Meireles et al., 2009; Colombie et al.,  
21 2013). Secondly, oocyte-specific Subito pathway compensates for the absence of  
22 microtubule nucleation by Augmin in the equator region.

23           Once microtubules are nucleated in the spindle equator, microtubules are cross-  
24 linked and their polarity is sorted out by microtubule motors (Bennabi et al., 2016). As the  
25 mammalian orthologue of Subito, MKlp2, has been shown to bundle microtubules (Neef et  
26 al., 2003), Subito can potentially coordinate nucleation, cross-linking and polarity sorting  
27 during meiotic spindle assembly.

1           In addition, our study highlights a central role of Subito in spatially restricting  
2 microtubule amplification to the vicinity of chromosomes in *Drosophila* oocytes. This spatial  
3 regulation is crucial, as oocytes commonly contain exceptionally large cytoplasmic volumes.  
4 We showed that the N-terminal non-motor region of Subito suppresses ectopic microtubule  
5 nucleation by inhibiting the interaction with Grip71, the subunit responsible for recruiting the  
6  $\gamma$ -tubulin complex. It is possible that the N-terminal region may recruit a protein which  
7 inhibits the interaction with Grip71. However, there are many examples of auto-inhibition of  
8 kinesins by their non-motor region (Verhey and Hammond, 2009). It is therefore likely that a  
9 signal from chromosomes locally abolishes auto-inhibition of the Subito nucleation activity in  
10 order to trigger spindle microtubule nucleation in a spatially confined manner. In simple  
11 terms, chromosomes switch on Subito-dependent nucleation, while this pathway remains  
12 switched off in the cytoplasm of the oocyte. Ran-GTP or Aurora B activity could potentially  
13 act as the signal from the meiotic chromosomes to remove auto-inhibition of Subito (Bennabi  
14 et al., 2016; Radford et al., 2017). Taken together, tight regulation of Subito appears critical  
15 to assemble spindle microtubules around the chromosomes and to prevent their assembly  
16 anywhere else.

17

## 1 **Methods**

2

### 3 **Recombinant DNA techniques**

4 Standard molecular techniques (Sambrook et al., 1989) were followed throughout. cDNA of  
5 each gene of interest was cloned firstly into pENTR/D-TOPO using pENTR Directional Topo  
6 Cloning Kit (Invitrogen). The absence of unwanted mutations was confirmed by DNA  
7 sequencing using BigDye (PerkinElmer). cDNAs were then recombined into Gateway  
8 destination vectors using LR Clonase II reaction following the manufacturer's protocol  
9 (Invitrogen). To generate transgenic flies expressing a GFP-tagged protein under the UASp  
10 promoter, we used  $\phi$ PGW modified from destination vector pPGW of the Murphy's Gateway  
11 collection (<https://emb.carnegiescience.edu/drosophila-gateway-vector-collection>) by adding  
12 the  $\phi$ C31 attB recombination site (Beaven et al., 2017).

13 To generate the *Grip71* entry clone, an entire coding region was amplified from  
14 cDNA (RE05579) by PCR. This cDNA contains a cytosine deletion at 2,134 bp that induces  
15 a premature stop codon. The cytosine has been added back to restore Grip71 complete  
16 coding region (1-646 amino acids followed by a stop codon) using the Quick Change II XL  
17 Site-Directed Mutagenesis kit (Promega) and the following primers:

18 CCAACATTTCCGTGGCCAGCAGCACAGGAGGCGGCAGCG and  
19 CGCTGCCGCCTCCTGTGCTGCTGGCCACGGAATGTTGG.

20 To generate the *subito* entry clone, a full-length coding region (encoding 1-628 amino  
21 acids followed by a stop codon) or a part of the coding region (*Subito* $\Delta$ N encoding 90-628  
22 amino acids followed by a stop codon) was amplified from cDNA (LD35138) by PCR.

23 For flies expressing *Grip71* shRNA, a Walium22 plasmid carrying shRNA against  
24 position 63 of the 5'UTR of the *Grip71* gene was generated following TRiP protocol  
25 (<http://hwpi.harvard.edu/files/fly/files/2ndngenprotocol.pdf?m=1465918000>) using the  
26 following primers:

27 CTAGCAGTGTGTAATATCTGAAGAAATATAGTTATATTCAAGCATATATTTCTTCAGATA  
28 TTTACACGCG and

1 AATTCGCGTGTAATATCTGAAGAAATATATGCTTGAATATAACTATATTTCTTCAGATAT  
2 TTACACACTG.

3 For Figure 4B, an additional line expressing a different shRNA directed against  
4 position 375 of the coding region of *Grip71* gene was generated using the following primers:

5 CTAGCAGTGAGCGGTTGTGTTAAGCTATATAGTTATATTCAAGCATATATAGCTTAACAC  
6 AACCGCTCGCG and

7 AATTCGCGAGCGGTTGTGTTAAGCTATATATGCTTGAATATAACTATATAGCTTAACACA  
8 ACCGCTCACTG.

9 For RNAi in S2 cells, dsRNA against the  $\beta$ -lactamase gene was used as a control as  
10 previously described (Syred et al., 2013). For *Grip71* RNAi in S2 cells (Fig S1A, B), double-

11 stranded RNAs were amplified in the first PCR using the following pairs of primers

12 containing half of the T7 promoter and the full T7 promoter sequence was added in the

13 second PCR using the primer, CGACTCACTATAGGGAGAGCGGGGATTCTCTTTGT. In

14 the first PCR, the region 504-925 bp of *Grip71* coding sequence was amplified using

15 CGACTCACTATAGGGAGACCGAGCAAACGCTTTCAT and

16 CGACTCACTATAGGGAGATGCTGGTCATCCCCACTT for *Grip71* RNAi 1, and the region

17 1062-1479 bp of *Grip71* coding sequence was amplified by

18 CGACTCACTATAGGGAGATTGGTTACGGGGTGTCAA and

19 GAATTAATACGACTCACTATAGGGAGA for *Grip71* RNAi 2. The PCR products were *in*

20 *vitro* transcribed and purified using MEGAscript T7 High Yield Transcription Kit (Ambion)

21 following the manufacturer's instructions.

22

### 23 ***Drosophila* techniques**

24 Standard methods of fly handling (Ashburner et al., 2005) were used. *w*<sup>1118</sup> was used as

25 wild type in this study. For a *Grip71* deletion mutant, we used *Dgp71WD*<sup>120</sup> over a

26 deficiency from a cross between *Dgp71WD*<sup>120</sup>/*SM6A* (Reschen et al., 2012) and a deficiency

27 *Df(2L)ED1196/SM6A*. The *wac* deletion mutant line used in this study was a homozygote

28 from a *wac* <sup>$\Delta$ 12</sup>/*TM6C* stock (Meireles et al., 2009). A line expressing shRNA against *subito*



1 (GL00583) was used to inhibit *subito* expression. Two lines expressing shRNA against  
2 *Grip71* 5'UTR or the coding region (this study) were used to inhibit *Grip71* expression. In  
3 Figure 4B, as both lines gave very similar results, they were pooled together for the analysis.  
4 For other experiments, the line expressing shRNA against *Grip71* 5'UTR was used. The line  
5 (GL00094) expressing shRNA against *white* was used as a negative control (control RNAi)  
6 in this study. shRNA and transgenes encoding for GFP-*Grip71*, GFP-*Subito* WT and GFP-  
7 *Subito*ΔN under the control of the UASp promoter were expressed using one copy of a  
8 female germline specific GAL4 driver, *nos-GAL4-VP16 MVD1*, except Figure 2. In Figure 2,  
9 a maternal-tubulin GAL4 driver V37 was used in one of the three experiments, but as it gave  
10 a similar result to the other two using MVD1, all three experiments were analysed together.  
11 To express GFP-*Subito* WT or GFP-*Subito*ΔN together with *white* shRNA (a negative  
12 control) or *Grip71* shRNA, a recombinant chromosome between two transgenes (both on the  
13 third chromosome) was generated and then crossed with MVD1. Recombinant  
14 chromosomes were established by selecting and confirming using visible markers and PCR  
15 after meiotic recombination in females.

16 For generating transgenic fly lines, φPGW carrying cDNA encoding the full-length  
17 *Subito* (*Subito* WT) and *Subito*ΔN, and an empty φPGW, were integrated at the landing site  
18 VK33 (Venken et al., 2006) on the third chromosome using φC31 integrase by Best Genes  
19 Inc.. Similarly, φPGW carrying cDNA encoding the full-length *Grip71* and *Walium22* carrying  
20 shRNA targeting 5' UTR or the coding sequence of *Grip71* were integrated at attP2 (Groth et  
21 al., 2004) on the third chromosome.

22

### 23 **Immunological reagents and techniques**

24 For generating an anti-*Grip71* antibody, an entry vector (pENTR/D-TOPO) carrying the  
25 *Grip71* full coding sequence from a cDNA (RE05579) was used. The cDNA has a mutation  
26 that leads to a premature stop codon after 493rd amino acid of *Grip71*. For expression of  
27 GST-tagged or MBP-tagged truncated *Grip71* (*Grip71*\*) in bacteria, the entry plasmid was  
28 recombined with expression vectors (pGEX4T1 and pMALc2) adapted to Gateway via LR

1 Clonase (Invitrogen), respectively. *BL21(DE3) pLysS* containing GEX4T1-Grip71\* were  
2 cultured overnight at 18°C in the presence of 1 mM IPTG. Bacteria were lysed by sonication  
3 in PBS + 0.5% Triton X-100 and spun down at 4,000 rpm for 5 min. The pellet contained  
4 most of GST-Grip71\* which were largely insoluble in this condition. After a wash in the  
5 same buffer, the pellet was run on an SDS protein gel, and eluted from the gel by diffusion in  
6 0.2M NaHCO<sub>3</sub> + 0.02% SDS. A total of 2.5 mg of protein (4 injections) was used to  
7 immunise a rabbit by Scottish National Blood Transfusion Service. The final anti-serum was  
8 then affinity-purified using MBP-Grip71\* on nitrocellulose membranes as previously  
9 described (Smith and Fisher, 1984; Clohisey et al., 2014).

10 The following primary antibodies were used for immunofluorescence microscopy (IF)  
11 and immunoblots (IB) in the study: anti-GFP (rabbit polyclonal A11122; Thermo Fisher  
12 Scientific; 1:250 for IF and IB), anti-Subito (rat polyclonal against GST-Subito full-length; Loh  
13 et al., 2012; 1:250), anti-Grip71 (rabbit polyclonal affinity purified; this study; 1:2-1:10 for IF  
14 and 1:50 for IB), anti-γ-tubulin (mouse monoclonal GTU88; Sigma-Aldrich; 1:250 for IB),  
15 anti-α-tubulin (mouse monoclonal DM1A; Sigma-Aldrich; 1:250 for IF). Alexa 488-, Alexa  
16 647, Cy3-, Cy5-conjugated secondary antibodies were used (1:250 to 1:1000; Jackson  
17 Laboratory or Molecular Probes) for IF, and IRDye 800CW conjugated goat anti-rabbit  
18 (1:20,000), IRDye 680LT conjugated goat anti-rabbit (1:15,000), and IRDye 800CW  
19 conjugated goat anti-mouse (1:20,000) secondary antibodies (LI-COR) were used for IB.

20 For immunoblotting, SDS-PAGE (sodium dodecyl sulfate polyacrylamide gel  
21 electrophoresis) were carried out and proteins on the gel were transferred onto a  
22 nitrocellulose membrane following a standard procedure (Sambrook et al., 1989). Total  
23 proteins on the membrane were stained with MemCode reversible staining kit (Thermo-  
24 Fisher) or Ponceau (Sigma-Aldrich). After being destained, the membrane was incubated  
25 with primary antibodies followed by fluorescent secondary antibodies (LI-COR). The signals  
26 were detected with an Odyssey imaging system for Figure 2B, S1B,E and an Odyssey CLx  
27 imaging scanner (LI-COR) for Figure 6. The brightness and contrast were adjusted  
28 uniformly across the entire area without removing or altering features.

1 For immunoblotting of ovaries, 10 ovaries or 100 oocytes were dissected from  
2 mature females in methanol. Methanol was replaced by 50  $\mu$ l of water and 50  $\mu$ l of boiling  
3 2x sample buffer (50 mM Tris-HCl pH6.8; 2% SDS; 10% glycerol; 0.1% Bromophenol Blue;  
4 715 mM 2-mercaptoethanol). Ovaries were homogenised in a microtube using a pestle  
5 (Eppendorf). The equivalent of 20 oocytes (20  $\mu$ l, Figure S1E) or 1 ovary (10  $\mu$ l, Figure 2D)  
6 were loaded on a gel for SDS-PAGE followed by immunoblot. For S2 cells, 5 million cells  
7 were spun down at 500xg for 10 minutes, washed once with PBS at room temperature then  
8 resuspended in 50  $\mu$ l of water and 50  $\mu$ l of boiling 2x sample buffer. The equivalent of  
9 500,000 cells were loaded on a gel for SDS-PAGE followed by immunoblot (Figure S1B).

10

### 11 **Cytology and image analysis**

12 For immunostaining of mature oocytes, freshly eclosed females were kept with males for 3-5  
13 days at 25°C with an excess of dried yeast. Ovaries from matured females were dissected  
14 in methanol and, after removing the chorion by sonication, oocytes were stained as  
15 previously described (Cullen and Ohkura, 2001). Under this experimental condition, most  
16 oocytes were arrested at stage 14.

17 Microtubule regrowth experiments in Figure 4C-F were carried out as follows. 24  
18 microtubes containing 1-2 mature females each were incubated on ice for 4 hours to  
19 depolymerise microtubules. The absence of microtubules in oocytes after 4 hours on ice  
20 was confirmed by immunostaining. Each tube was transferred one-by-one to water at 25°C,  
21 and after 2 minutes, ovaries were dissected in methanol and processed for immunostaining.

22 Immunostained oocytes were imaged with a confocal scan head, LSM510Exciter  
23 (Zeiss; Figure 1A, 2A,C, 4A, S1C) or LSM800 with GaAsP photomultipliers (Zeiss; Figure 3,  
24 4B,D,E,F), attached to an Axiovert 200M (Zeiss) using 63x/NA1.40 Plan-ApoChromat  
25 objective (oil) and 0.5  $\mu$ m Z-step acquisition. The capturing resolution was set for 100 nm  
26 per pixel. Representative images are shown in figures after maximum intensity projection of  
27 multiple Z-planes including the entire spindle. The contrast and brightness of microscope

1 images shown in the figures were unaltered. When the signal intensity is compared (Figure  
2 3A,B), the images were taken using the same settings.

3 For *Drosophila* S2 cells (Schneider, 1972), about 1 million cells were aliquoted into  
4 each well of a 6-well petri dish with 1 ml of Serum Free Medium (Schneider). 15  $\mu$ g of  
5 dsRNA is added to each well. After 1 hour, 2 ml of the medium containing 10% FCS was  
6 added to the cells. Three days later the cells were transferred to concanavalin A coated  
7 coverslips (18x18 mm, VWR), fixed with a cold solution containing 90% methanol, 2.88%  
8 paraformaldehyde and 5mM NaHCO<sub>3</sub> (pH9), and stained as previously described  
9 (Dzhindzhev et al., 2005). A single Z section of S2 cells was imaged with a CCD camera  
10 (Orca; Hamamatsu) attached to an upright microscope (Axioplan2) controlled by OpenLab  
11 (Improvision) using a 100x/NA1.4 Plan-ApoChromat objective.

12 For Figure 3, the total tubulin intensity was measured on spindles imaged with the  
13 same setting (A). If some signals were saturated, a second image was taken with a lower  
14 laser intensity (B). To compensate for the lower laser power, a laser coefficient was  
15 calculated by the ratio (A/B) of the total signal intensity of three spindles without saturated  
16 signals taken by these two settings. Tubulin signal intensity was measured from maximum  
17 intensity projection of a Z-stack. A region S mainly containing the spindle was drawn, and  
18 the total intensity (IntDenS) and the area size (AreaS) was measured. A second region L  
19 containing the spindle and the surrounding background was drawn, and the total tubulin  
20 intensity (IntDenL) and the area size (AreaL) were measured. The following formula was  
21 then applied to calculate the total tubulin intensity for each spindle:  $\text{IntDenS} - \text{AreaS} * (\text{IntDenL} -$   
22  $\text{IntDenS}) / (\text{AreaL} - \text{AreaS})$ . For the overexposed spindles, the tubulin intensity was measured  
23 from an image captured using setting B and the following formula was applied:  
24  $\text{LaserCoefficient} * [\text{IntDenS} - \text{AreaS} * (\text{IntDenL} - \text{IntDenS}) / (\text{AreaL} - \text{AreaS})]$ . Two-tailed Wilcoxon  
25 rank-sum test was used for testing statistical significance.

26 For Figure 4E,F, S1D, the tubulin and Grip71 signal intensities were measured from  
27 the maximum intensity projection of a Z-stack as follows. A small region of interest (region  
28 C) was drawn on the ectopic spindle (Figure 4E,F) or near the chromosomes on the spindle

1 (Figure S1D), and the total signal intensities of tubulin and Grip71 were measured. A region  
2 of interest with the identical shape and size (region D) was drawn in a background region  
3 and the total signal intensities were measured. The specific signal intensity was calculated  
4 by subtracting the total intensity of region D from the total intensity of region C. For Figure  
5 S1D, the specific signal intensity of Grip71 was then normalised by dividing it by the specific  
6 tubulin signal intensity of the same spindle. Two-tailed Wilcoxon rank-sum test was used for  
7 testing statistical significance.

8 For Figure 1B, 2E and 3C, accumulation of Grip71 and Subito in the spindle equator  
9 and poles was judged in comparison with the intensity distribution of tubulin signals by visual  
10 inspection of each Z-plane. To check the validity of classification, a series of raw images on  
11 which Figure 1B is based were independently examined by another researcher in a blind  
12 manner, which gave a similar result. Multiple independent batches of immunostaining were  
13 carried out for each genotype, and the mean and standard error (SEM) were calculated for  
14 the percentage of spindles which showed the accumulation in each replicate. Two-tailed  
15 unpaired t-test was used for testing statistical significance.

16 For Figure 4B,D, the entire oocytes were observed for the presence or absence of  
17 dense microtubule arrays not associated with the meiotic chromosomes ("ectopic spindles").  
18 Two independent batches of immunostaining were carried out for each genotype in D, and  
19 the mean and standard error (SEM) were calculated for the percentage of oocytes which  
20 have visible ectopic spindles in each replicate. Two-tailed unpaired t-test was used for  
21 testing statistical significance. As only one batch of immunostaining was carried out for  
22 GFP-Subito $\Delta$ N + *white* shRNA in B, statistical significance was tested by Fisher's exact test.

23

#### 24 **Immunoprecipitation and microtubule nucleation assay**

25 Immunoprecipitation and microtubule nucleation assay shown in Figure 5, 6 and S2 were  
26 carried out as follows. Flies expressing GFP, GFP-Grip71, GFP-Subito WT + *white* shRNA,  
27 GFP-Subito WT + *Grip71* shRNA, GFP-Subito $\Delta$ N + *white* shRNA, or GFP-Subito $\Delta$ N +  
28 *Grip71* shRNA were matured with dried yeast for 3-5 days at 25°C. 20 pairs of ovaries from

1 each genotype were dissected in PBS + 2 mM EGTA and frozen with a minimum carry-over  
2 of the buffer on the side of a microtube prechilled on dry ice. Microtubes were snap frozen  
3 in liquid nitrogen and stored at -80°C.

4 For immunoprecipitation, 20 pairs of frozen ovaries were resuspended in 400 µl of  
5 lysis buffer (20 mM Tris-HCl pH7.5, 50 mM NaCl, 5 mM EGTA, 1 mM DTT supplemented  
6 with 1 mM PMSF, inhibitor of protease (Roche, 1 tablet for 10 ml)) + 1 µM okadaic acid, 10  
7 mM p-nitrophenyl phosphate and 0.5% Triton X-100 and homogenised on ice with a Dounce  
8 tissue grinder (1 ml). Lysates were incubated on ice for 30 minutes and transferred in a  
9 microtube before being centrifuged for 30 minutes, at 13,000 rpm at 4°C. 10 µl was kept as  
10 Input and mixed with 10 µl of boiling 2x sample buffer, and the rest was used for the  
11 following immunoprecipitation. 11 µl of anti-GFP magnetic beads (Chromotek) were washed  
12 three times with cold lysis buffer + 0.1% Triton X-100 before being mixed with lysate  
13 supernatant for 1 hour at 4°C on a rotating wheel. The beads were washed once with cold  
14 lysis buffer containing 0.1% Triton X-100, 1 µM okadaic acid and 10 mM p-nitrophenyl  
15 phosphate. The beads were additionally washed twice with cold lysis buffer + 0.1% Triton X-  
16 100 and twice with cold BRB80 (80 mM PIPES, 1 mM MgCl<sub>2</sub>, 1 mM EGTA, pH 6.8). The  
17 beads were resuspended in 10 µl of cold BRB80 and kept on ice for the following  
18 microtubule nucleation assay.

19 For nucleation assay, pig unlabelled pure tubulin (Cytoskeleton T240-B) and pig  
20 rhodamine-labelled pure tubulin (Cytoskeleton TL590M-A) were resuspended in BRB80 + 1  
21 mM GTP to a final concentration of 50 µM and 100 µM, respectively. Unlabelled and  
22 labelled tubulin were mixed (4.5:1 in molar concentration) to a final concentration of 55 µM  
23 then diluted in BRB80 + 1 mM GTP to a final concentration of 36.6 µM. 9 µl of this mix was  
24 added to 1 µl of the beads for a final concentration of 33 µM of tubulin. The beads and  
25 tubulin were incubated for 3 minutes at 37°C to allow polymerisation. To stop the reaction,  
26 10 µl of BRB80 at 37°C containing 1 mM GTP and 2% glutaraldehyde (Sigma-Aldrich  
27 G6403) was added to 10 µl of the reaction and gently mixed using a pipet tip, the end of  
28 which has been cut off. 10 µl of the reaction was mixed with 10 µl of BRB80 + 30% glycerol

1 (15% glycerol final) to increase the viscosity and reduce movement of the beads. 4  $\mu$ l of the  
2 reaction was mounted between two coverslips (24x50mm and 18x18mm, VWR).

3 Images were taken using a PlanApochromat lens (63x/1.4NA; Zeiss) attached to an  
4 Axiovert 200M microscope (Zeiss) with a spinning disc confocal scan head (CSU-X1;  
5 Yokogawa) operated by Volocity (PerkinElmer). 20-40 random fields were imaged with 488  
6 nm laser (20%) to detect the GFP beads and 561 nm laser (20%) to detect the rhodamine  
7 labelled microtubules (250 ms exposure, 0.8  $\mu$ m Z-interval). Microtubules associated with  
8 each bead cluster were counted from the maximum intensity projection of Z-stack. The  
9 numbers of free microtubules were counted in the single Z-plane where the GFP intensity  
10 was the highest (Figure S2). Two-tailed unpaired Wilcoxon rank-sum test was used for  
11 testing statistical significance. The images were taken using the identical setting and are  
12 shown in Figure 5B after applying the identical contrast and brightness enhancement. After  
13 the experiment, about 10  $\mu$ l of the remaining beads were mixed with 10  $\mu$ l of boiling 2x  
14 sample buffer. 10  $\mu$ l of Input and beads (IP) were loaded on a gel for SDS-PAGE followed  
15 by immunoblot (Figure 6).

16 Immunoprecipitation shown in Figure 2B was carried out as follows. Ovaries were  
17 dissected from matured females for each condition in PBS + 0.5% Triton X-100. 25 pairs of  
18 ovaries were resuspended in 500  $\mu$ l of lysis buffer. Ovaries were homogenised on ice using  
19 a Dounce tissue grinder (1 ml). Lysates were incubated on ice for 30 minutes and  
20 transferred in a microtube before being centrifuged at 13,000 rpm for 30 minutes at 4°C. 50  
21  $\mu$ l of the supernatant was kept as Input and mixed with 50  $\mu$ l of boiling 2x sample buffer, and  
22 the rest is kept for the following immunoprecipitation. 30  $\mu$ l of anti-GFP magnetic beads  
23 were washed three times with cold lysis buffer + 0.1% Triton X-100 before being mixed with  
24 the lysate supernatant for 2 hours at 4°C on a rotating wheel. The beads were isolated with  
25 a magnetic rack and washed three times with cold lysis buffer + 0.1% Triton X-100. The  
26 beads were resuspended in 50  $\mu$ l of cold lysis buffer + 0.1% Triton X-100 and mixed with 50  
27  $\mu$ l of 2x boiling sample buffer. 10  $\mu$ l of the Input and beads (IP) were loaded on a gel for  
28 SDS-PAGE followed by immunoblot.

1

2 **Data availability**

3 The datasets generated and/or analysed during the current study are available from the  
4 corresponding author upon request.

5



1 **Acknowledgements**

2 We are grateful to all the members of the Ohkura lab and D. Finnegan for their help and  
3 useful feedback, to E. Peat for her technical help and to J. Raff, the Bloomington Drosophila  
4 Stock Center and Resource Center (NIH P40OD018537, 2P40OD010949-10A1) and the  
5 Transgenic RNAi Project at Harvard Medical School (NIH/NIGMS R01-GM084947) for fly  
6 stocks and reagents. The work is supported by Wellcome Trust Senior Research  
7 Fellowships (081849, 098030) and Investigator Award (206315) to HO. The Wellcome  
8 Centre for Cell Biology is supported by a core grant (092076, 203149).

9

10 **Author contributions**

11 PR designed and performed experiments, analysed the data and wrote the manuscript; HO  
12 designed experiments, analysed the data, and wrote the manuscript.

13

14 **Competing interests**

15 The authors do not have any competing interests.

16

17

## 1 **References**

2

3 Ashburner M., Golic K.G., Hawley R.S. (2005) Cold Spring Harbor (New York): Cold Spring  
4 Harbor Laboratory Press.

5

6 Basto R., Lau J., Vinogradova T., Gardiol A., Woods C.G., Khodjakov A., Raff J.W. (2006)  
7 Flies without centrioles. *Cell*. 125, 1375-1386.

8

9 Beaven R., Bastos R.N., Spanos C., Romé P., Cullen C.F., Rappsilber J., Giet R., Goshima  
10 G., Ohkura H. (2017) 14-3-3 regulation of Ncd reveals a new mechanism for targeting  
11 proteins to the spindle in oocytes. *J Cell Biol*. 216, 3029-3039.

12

13 Bennabi I., Terret M.E., Verlhac M.H. (2016) Meiotic spindle assembly and chromosome  
14 segregation in oocytes. *J Cell Biol*. 215, 611-619.

15

16 Chen J.W.C., Chen Z.A., Rogala K.B., Metz J., Deane C.M., Rappsilber J., Wakefield J.G.  
17 (2017) Cross-linking mass spectrometry identifies new interfaces of Augmin required to  
18 localise the  $\gamma$ -tubulin ring complex to the mitotic spindle. *Biol Open*. 6, 654-663.

19

20 Clohisey S.M., Dzhindzhev N.S., Ohkura H. (2014) Kank Is an EB1 interacting protein that  
21 localises to muscle-tendon attachment sites in *Drosophila*. *PLoS One*. 9, e106112.

22

23 Colombié N., Cullen C. F., Brittle A. L., Jang J. K., Earnshaw W. C., Carmena M., McKim K.,  
24 Ohkura H. (2008) Dual roles of Incenp crucial to the assembly of the acentrosomal  
25 metaphase spindle in female meiosis. *Development* 135, 3239-3246.

26

- 1 Colombié N., Głuszek A.A., Meireles A.M., Ohkura H. (2013) Meiosis-specific stable binding  
2 of augmin to acentrosomal spindle poles promotes biased microtubule assembly in oocytes.  
3 PLoS Genet. 9, e1003562.  
4
- 5 Cullen C.F., Ohkura H. (2001) Msp protein is localized to acentrosomal poles to ensure  
6 bipolarity of *Drosophila* meiotic spindles. Nat Cell Biol. 3, 637-642.  
7
- 8 Dzhindzhev N.S., Rogers S.L., Vale R.D., Ohkura H. (2005) Distinct mechanisms govern the  
9 localisation of *Drosophila* CLIP-190 to unattached kinetochores and microtubule plus-ends. J  
10 Cell Sci. 118, 3781-3790.  
11
- 12 Giunta K.L., Jang J.K., Manheim E.A., Subramanian G., McKim K.S. (2002) *subito* encodes a  
13 kinesin-like protein required for meiotic spindle pole formation in *Drosophila melanogaster*.  
14 Genetics. 160, 1489-1501.  
15
- 16 Goshima G., Mayer M., Zhang N., Stuurman N., Vale R.D. (2008) Augmin: a protein  
17 complex required for centrosome-independent microtubule generation within the spindle. J  
18 Cell Biol. 181, 421-429.  
19
- 20 Goshima G., Kimura A. (2010) New look inside the spindle: microtubule-dependent  
21 microtubule generation within the spindle. Curr Opin Cell Biol. 22, 44-49.  
22
- 23 Groth A., Fish M., Nusse R., Calos M.P. (2004) Construction of transgenic *Drosophila* by  
24 using the site-specific integrase from phage PhiC31. Genetics 166: 1775-1782.  
25
- 26 Haren L., Remy M.H., Bazin I., Callebaut I., Wright M., Merdes A. (2006) NEDD1-dependent  
27 recruitment of the gamma-tubulin ring complex to the centrosome is necessary for centriole  
28 duplication and spindle assembly. J Cell Biol. 172, 505-515.

1

2 Hinchcliffe E.H., Miller F.J., Cham M., Khodjakov A., Sluder G. (2001) Requirement of a  
3 centrosomal activity for cell cycle progression through G1 into S phase. *Science*. 291, 1547-  
4 1550.

5

6 Jang J.K., Rahman T., McKim K.S. (2005) The kinesinlike protein Subito contributes to  
7 central spindle assembly and organization of the meiotic spindle in *Drosophila* oocytes. *Mol*  
8 *Biol Cell*. 16, 4684-4694.

9

10 Jang J.K., Rahman T., Kober V.S., Cesario J., McKim K.S. (2007) Misregulation of the  
11 kinesin-like protein Subito induces meiotic spindle formation in the absence of chromosomes  
12 and centrosomes. *Genetics*. 177, 267-280.

13

14 Kamasaki T, O'Toole E, Kita S, Osumi M, Usukura J, McIntosh JR, Goshima G. (2013)  
15 Augmin-dependent microtubule nucleation at microtubule walls in the spindle. *J Cell Biol*.  
16 202, 25-33.

17

18 Karsenti E., Vernos I. (2001) The mitotic spindle: a self-made machine. *Science*. 294, 543-  
19 547.

20

21 Khodjakov A., Cole R.W., Oakley B.R., Rieder C.L. (2000) Centrosome-independent mitotic  
22 spindle formation in vertebrates. *Curr Biol*. 10, 59-67.

23

24 Kollman J.M., Merdes A., Mourey L., Agard D.A. (2011) Microtubule nucleation by  $\gamma$ -tubulin  
25 complexes. *Nat Rev Mol Cell Biol*. 12, 709-721.

26

27 Lawo S., Bashkurov M., Mullin M., Ferreria M.G., Kittler R., Habermann B., Tagliaferro A.,  
28 Poser I., Hutchins J.R., Hegemann B., Pinchev D., Buchholz F., Peters J.M., Hyman A.A.,

- 1 Gingras A.C., Pelletier L. (2009) HAUS, the 8-subunit human Augmin complex, regulates  
2 centrosome and spindle integrity. *Curr Biol.* 19, 816-826.  
3
- 4 Loh B.J., Cullen C.F., Vogt N., Ohkura H. (2012) The conserved kinase SRPK regulates  
5 karyosome formation and spindle microtubule assembly in *Drosophila* oocytes. *J Cell Sci.*  
6 125, 4457-4462.  
7
- 8 Lüders J., Patel U.K., Stearns T. (2006) GCP-WD is a gamma-tubulin targeting factor  
9 required for centrosomal and chromatin-mediated microtubule nucleation. *Nat Cell Biol.* 8,  
10 137-147.  
11
- 12 Mahoney N.M., Goshima G., Douglass A.D., Vale R.D. (2006) Making microtubules and  
13 mitotic spindles in cells without functional centrosomes. *Curr Biol.* 16, 564-569.  
14
- 15 McKim K., Hawley R.S. (1995) Chromosomal control of meiotic cell division. *Science.* 270,  
16 1595-1601.  
17
- 18 Meireles A.M., Fisher K.H., Colombié N., Wakefield J.G., Ohkura H. (2009) Wac: a new  
19 Augmin subunit required for chromosome alignment but not for acentrosomal microtubule  
20 assembly in female meiosis. *J Cell Biol.* 184, 777-784.  
21
- 22 Meunier S, Vernos I. (2016) Acentrosomal Microtubule Assembly in Mitosis: The Where,  
23 When, and How. *Trends Cell Biol.* 2016 26, 80-87.  
24
- 25 Mitchison T, Kirschner M. (1984) Dynamic instability of microtubule growth.  
26 *Nature.* 312, 237-242.  
27

- 1 Moutinho-Pereira S., Stuurman N., Afonso O., Hornsveld M., Aguiar P., Goshima G., Vale  
2 R.D., Maiato H. (2013) Genes involved in centrosome-independent mitotic spindle assembly  
3 in *Drosophila* S2 cells. *Proc Natl Acad Sci U S A.* 110, 19808-19813.  
4
- 5 Neef R., Preisinger C., Sutcliffe J., Kopajtich R., Nigg E.A., Mayer T.U., Barr F.A. (2003)  
6 Phosphorylation of mitotic kinesin-like protein 2 by polo-like kinase 1 is required for  
7 cytokinesis. *J Cell Biol.* 162, 863-875.  
8
- 9 Prosser S.L., Pelletier L. (2017) Mitotic spindle assembly in animal cells: a fine balancing  
10 act. *Nat Rev Mol Cell Biol.* 18, 187-201.  
11
- 12 Radford S.J., Nguyen A.L., Schindler K., McKim K.S. (2017) The chromosomal basis of  
13 meiotic acentrosomal spindle assembly and function in oocytes. *Chromosoma.* 126, 351-  
14 364.  
15
- 16 Reschen R.F., Colombie N., Wheatley L., Dobbelaere J., St Johnston D., Ohkura H., Raff  
17 J.W. (2012) Dgp71WD is required for the assembly of the acentrosomal Meiosis I spindle,  
18 and is not a general targeting factor for the  $\gamma$ -TuRC. *Biol Open.* 1, 422-429.  
19
- 20 Sambrook, J., Fritsch, E.F., Maniatis, T. (1989) *Molecular Cloning: A Laboratory Manual.*  
21 Cold Spring Harbour New York: Cold Spring Harbour Laboratory Press.  
22
- 23 Schneider I. (1972) Cell lines derived from late embryonic stages of *Drosophila*  
24 *melanogaster*. *J Embryol Exp Morphol.* 27, 353-365.  
25
- 26 Smith D.E., Fisher P.A. (1984) Identification, developmental regulation, and response to  
27 heat shock of two antigenically related forms of a major nuclear envelope protein in

- 1 Drosophila embryos: application of an improved method for affinity purification of antibodies  
2 using polypeptides immobilized on nitrocellulose blots. *J Cell Biol.* 99, 20-28.  
3
- 4 Syred H.M., Welburn J., Rappsilber J., Ohkura H. (2013) Cell cycle regulation of microtubule  
5 interactomes: multi-layered regulation is critical for the interphase/mitosis transition. *Mol Cell*  
6 *Proteomics.* 12, 3135-3147.  
7
- 8 Teixidó-Travesa N., Roig J., Lüders J. (2012) The where, when and how of microtubule  
9 nucleation - one ring to rule them all. *J Cell Sci.* 125, 4445-4456.  
10
- 11 Uehara R., Nozawa R.S., Tomioka A., Petry S., Vale R.D., Obuse C., Goshima G. (2009)  
12 The augmin complex plays a critical role in spindle microtubule generation for mitotic  
13 progression and cytokinesis in human cells. *Proc Natl Acad Sci U S A.* 106, 6998-7003.  
14
- 15 Venken K.J.T., He Y., Hoskins R.A., Bellen H.J. (2006) PhiC31: a BAC transgenic platform  
16 for targeted insertion of large DNA fragments in *Drosophila melanogaster*. *Science*  
17 314,1747-1751.  
18
- 19 Verhey K.J., Hammond J.W. (2009) Traffic control: regulation of kinesin motors. *Nat Rev Mol*  
20 *Cell Biol.* 10, 765-777.  
21
- 22 Vérollet C., Colombié N., Daubon T., Bourbon H.M., Wright M., Raynaud-Messina B. (2006)  
23 *Drosophila melanogaster* gamma-TuRC is dispensable for targeting gamma-tubulin to the  
24 centrosome and microtubule nucleation. *J Cell Biol.* 172, 517-528.  
25
- 26 Wainman A., Buster D.W., Duncan T., Metz J., Ma A., Sharp D., Wakefield J.G. (2009) A  
27 new Augmin subunit, Msd1, demonstrates the importance of mitotic spindle-templated

1 microtubule nucleation in the absence of functioning centrosomes. *Genes Dev.* 23, 1876-  
2 1881.

3

4 Zhu H., Copping J.A., Jang C.Y., Yates J.R. 3rd, Fang G. (2008) FAM29A promotes  
5 microtubule amplification via recruitment of the NEDD1-gamma-tubulin complex to the  
6 mitotic spindle. *J Cell Biol.* 183, 835-848.

7



## 1 **Figure Legends**

2

### 3 **Figure 1. Grip71 is recruited to the spindle equator independently of Augmin in** 4 **oocytes**

5 (A) Immunostaining of a meiotic spindle in mature oocytes from wild type and a deletion  
6 mutant of *wac* gene encoding an essential subunit of the Augmin complex. Arrowheads  
7 indicate Grip71 at the spindle pole, and curved lines indicate the concentration of Grip71 in  
8 the spindle equator. Pole localisation of Grip71 was greatly reduced in *wac* mutant. Bar=5  
9  $\mu\text{m}$ . (B) The frequencies of meiotic spindles which have Grip71 concentration at the spindle  
10 equator and Grip71 localisation at at least one of the spindle poles, respectively. The  
11 graphs show the means (the main bars) and standard errors (error bars) from three repeats  
12 of experiments for wild type and *wac* $\Delta$  (38, 41 spindles in total). \*\*\* indicates a significant  
13 difference from wild type ( $p < 0.001$ ).

14

### 15 **Figure 2. Subito, the *Drosophila* MKIp2, recruits Grip71 to the spindle equator**

16 (A) Colocalisation of Subito with Grip71 in the spindle equator. Immunostaining of a meiotic  
17 spindle in mature wild-type oocytes, and signal intensities (arbitrary unit) along the line.  
18 Grip71 and Subito are correlated with each other, better than with  $\alpha$ -tubulin. Bar=5  $\mu\text{m}$ . (B)  
19 Subito physically interacts with  $\gamma$ -tubulin and Grip71. GFP or GFP-Subito was  
20 immunoprecipitated from oocytes expressing these proteins in the absence of phosphatase  
21 inhibitors, followed by immunoblots (IB). The figure shows one of biological triplicates, all of  
22 which showed co-immunoprecipitation. 10% of Input relative to the immunoprecipitated  
23 fraction (IP) was loaded. (C) Subito is required for Grip71 localisation to the spindle equator.  
24 Immunostaining of mature wild-type and *subito* RNAi oocytes. Arrowheads indicate Grip71  
25 localisation at the spindle pole, and curved lines indicate Grip71 concentration in the spindle  
26 equator. The equator localisation of Grip71 was lost in the *subito* RNAi oocyte. Bar=5  $\mu\text{m}$ .  
27 (D) Immunoblot of ovaries from wild-type and *subito* RNAi flies.

1 (E) The frequencies of meiotic spindles which have Subito and Grip71 concentration at the  
2 spindle equator and Grip71 localisation at at least one of the spindle poles, respectively.  
3 The graphs show the means and standard errors from three repeats for each of wild type  
4 and *subito* RNAi (86, 61 spindles in total). \*\*\* indicate significant differences from wild type  
5 ( $p < 0.001$ , respectively).

6

### 7 **Figure 3. Subito and Augmin complement each other to generate microtubules**

8 (A) Immunostaining of a meiotic spindle in mature oocytes from wild type expressing control  
9 (*white*) shRNA, a *wac* deletion mutant expressing *subito* shRNA, and wild type expressing  
10 *Grip71* shRNA. Arrowheads indicate Grip71 localisation at the spindle pole, and curved  
11 lines indicate Grip71 concentration on the spindle equator. Spindle microtubules were  
12 greatly reduced and Grip71 localisation on the spindle was lost in the *wac* deletion mutant  
13 expressing *subito* shRNA. These images were taken using the same settings and are  
14 shown without contrast enhancement. Bar=5  $\mu\text{m}$ . (B) The total tubulin intensity of the  
15 meiotic spindle in each genotype (37, 33, 73, 63, 67 spindles). RNAi of the *white* gene was  
16 used as the control RNAi. The median is indicated by the central line, and the second and  
17 third quartiles are indicated by the box. The Y-axis is broken into two with different scales to  
18 show all data. Data were pooled from triplicate experiments. (C) The frequencies of meiotic  
19 spindles which have Grip71 concentration at the spindle equator and Grip71 localisation at  
20 at least one of the spindle poles, respectively, and Subito at the equator. The graphs show  
21 the means and standard errors from four repeats for each genotype (53, 89, 98 spindles in  
22 total). \* and \*\*\* indicate significant differences from control RNAi ( $p < 0.05$ , and 0.001,  
23 respectively).

24

### 25 **Figure 4. Grip71 mediates ectopic microtubule assembly induced by expression of** 26 **Subito lacking the N-terminal region**

27 (A) Grip71 is recruited to the ectopic spindles in oocytes expressing Subito lacking the N-  
28 terminal 89 residues (Subito $\Delta$ N). Immunostaining of mature wild-type oocytes expressing

1 GFP-Subito $\Delta$ N that lacks the N-terminal non-motor domain as shown in the diagram. GFP-  
2 Subito $\Delta$ N was detected by an antibody against Subito. The boxed area is magnified below.  
3 Bars=10  $\mu$ m. (B) The frequencies of oocytes which have ectopic spindles when GFP-  
4 Subito $\Delta$ N was expressed together with control (*white*) or Grip71 shRNA. 100 and 160  
5 oocytes were examined, respectively. \*\*\* indicates a significant difference from wild type  
6 (Fischer's exact test). (C) Schematic diagram of microtubule regrowth experiments. (D) The  
7 frequencies of oocytes with ectopic spindles when GFP-Subito $\Delta$ N was expressed together  
8 with shRNA against control (*white*) or *Grip71* after microtubule regrowth. The graph shows  
9 the means and standard errors from two repeats for each genotype (202 and 277 oocytes in  
10 total). \* indicates a significant difference from wild type ( $p < 0.05$ ). (E,F) Signal intensities of  
11  $\alpha$ -tubulin and Grip71 on ectopic spindles above the cytoplasmic background after  
12 microtubule regrowth in each genotype (20, 24 oocytes). The graphs show the data from  
13 one of two repeated experiments, both of which showed decreases to similar levels in  
14 Grip71 RNAi oocytes. The median is indicated by the central line, and the second and third  
15 quartiles are indicated by the box. \*\* and \*\*\* indicates a significant difference from control  
16 RNAi ( $p < 0.01$  and  $0.001$ ).

17

18 **Figure 5. The Subito complex from ovaries can induce microtubule nucleation *in vitro***

19 (A) Schematic diagram of the assay of *in vitro* microtubule nucleation activity using an  
20 immunoprecipitated GFP-tagged protein (such as GFP-Subito) on beads incubated with  
21 pure pig  $\alpha, \beta$ -tubulin dimer. (B) GFP-tagged protein was immunoprecipitated from oocytes  
22 expressing the protein alone or together with control (*white*) or *Grip71* shRNA. These  
23 images were taken using the same settings and the same alteration of the brightness and  
24 contrast was applied to all to show beads and microtubule asters clearly. Bar=10  $\mu$ m. (C)  
25 The number of microtubules per bead cluster was counted for each genotype (75, 59, 70,  
26 76, 48, 56 bead clusters). \*\*\* indicates a significant difference from GFP beads in the  
27 proportion of bead clusters with  $\geq 6$  microtubules. The graph shows the data from one of  
28 two repeated experiments, both of which showed similar results. In both experiments, GFP-

1 Subito $\Delta$ N and GFP-Grip71 beads have a high microtubule nucleation activity, while GFP-  
2 Subito (GFP-Sub WT) beads have a lower nucleation activity. These activities depend on  
3 Grip71. GFP beads have virtually no nucleation activity.

4

5 **Figure 6. Subito interaction with Grip71 is negatively regulated by its N-terminal**  
6 **region**

7 GFP-tagged protein was immunoprecipitated from oocytes expressing the protein alone or  
8 together with control (*white*) or *Grip71* shRNA in the presence of phosphatase inhibitors,  
9 followed by immunoblots (IB). 2.5% of Input relative to the immunoprecipiated fraction (IP)  
10 was loaded.  $\gamma$ -tubulin and Grip71 were efficiently co-immunoprecipiated with GFP-  
11 Subito $\Delta$ N, but only weakly with GFP-Subito. Co-immunoprecipitation of  $\gamma$ -tubulin depends  
12 on Grip71. This figure shows the immunoblot from one of two repeated experiments, both of  
13 which provided similar results.

14

15 **Figure 7. Subito recruits the  $\gamma$ -tubulin complex to nucleate microtubules in the spindle**  
16 **equator in oocytes**

17 Schematic model of meiotic spindle assembly in oocytes. Subito and Augmin recruit the  $\gamma$ -  
18 tubulin complex to the spindle equator and poles, respectively, through Grip71. This  
19 nucleates a new microtubule to amplify spindle microtubules. These two pathways work  
20 complementarily to assemble most of the spindle microtubules in oocytes. The N-terminal  
21 region of Subito suppresses the interaction with the  $\gamma$ -tubulin complex away from  
22 chromosomes, but this suppression is removed near meiotic chromosomes. Subito lacking  
23 the N-terminal region constitutively associates with the  $\gamma$ -tubulin complex and induces  
24 ectopic microtubule nucleation away from chromosomes in the ooplasm.

25

## 1 **Supplementary information**

2

### 3 **Figure S1. Specificity of the anti-Grip71 antibody**

4 (A) Immunostaining of S2 cells incubated with control dsRNA (against  $\beta$ -lactamase gene)  
5 and two non-overlapping dsRNA against *Grip71*. The rabbit antibody against Grip71 stained  
6 spindle poles in control RNAi, but the signal greatly reduced in Grip71 RNAi cells. Bar=10  
7  $\mu$ m. (B) Immunoblot of S2 cells after RNAi using the anti-Grip71 antibody. The anti-Grip71  
8 antibody gave a band of the expected size, the intensity of which was greatly reduced  
9 following Grip71 RNAi. (C) Immunostaining of a meiotic spindle in mature oocytes from wild  
10 type and a Grip71 deletion mutant using the anti-Grip71 antibody. Bar=5  $\mu$ m. (D) Grip71  
11 signal intensity relative to  $\alpha$ -tubulin signal intensity near the chromosomes on the spindle in  
12 mature wild-type and *Grip71* $\Delta$  oocytes (10 spindles each). The signal intensity on the  
13 spindle in each oocyte was normalised using the background (cytoplasmic) intensity. The  
14 median is indicated by the central line, and the second and third quartiles are indicated by  
15 the box. The graph shows the data from one of two repeated experiments, both of which  
16 showed similar decreases in *Grip71* $\Delta$  oocytes. \*\*\* indicates a significant difference from wild  
17 type ( $p < 0.001$ ). (E) Immunoblot of ovaries from wild type and Grip71 deletion mutant probed  
18 by the anti-Grip71 antibody. The 75 kDa band disappeared in the deletion mutant and  
19 roughly coincides with the predicted molecular weight of Grip71, indicating that this band  
20 represents Grip71. On the other hand, the 42 kDa band (\*) that coincides with yolk proteins  
21 was unchanged, indicating that this band is non-specific.

22

### 23 **Figure S2. Subito $\Delta$ N beads induce microtubule nucleation rather than simply capture** 24 **microtubules**

25 The number of free microtubules observed per field (51  $\mu$ m x 102  $\mu$ m) in the *in vitro*  
26 microtubule nucleation assay shown in Figure 5 using immunoprecipitated beads and pure  
27  $\alpha/\beta$ -tubulin dimer (35, 40, 30, 39, 35, 34 fields). The median is indicated by the central line,  
28 and the second and third quartiles are indicated by the box. \*\*\* indicates a significant

1 difference from wild type ( $p < 0.001$ ). The graph shows the data from one of two repeated  
2 experiments, both of which provided similar results. A solution including GFP-Subito $\Delta$ N  
3 beads had much more free microtubules than one including control GFP beads, confirming  
4 that the GFP-Subito $\Delta$ N beads induced nucleation of microtubules (some of which were  
5 detached from the beads), rather than simply captured microtubules spontaneously  
6 nucleated in solution.

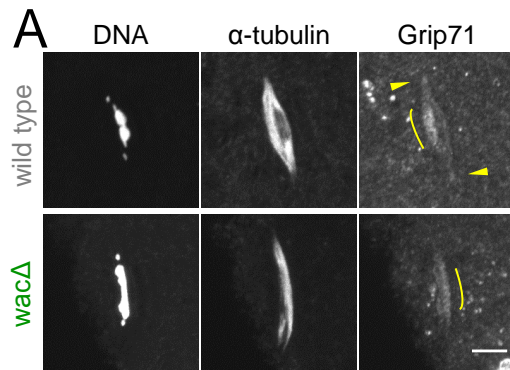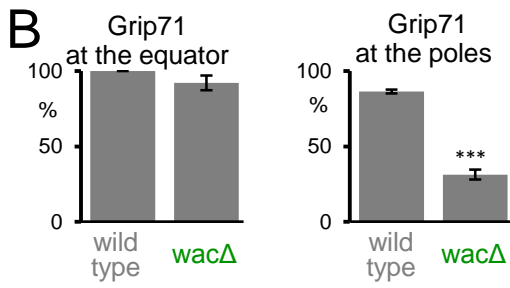

Figure 1

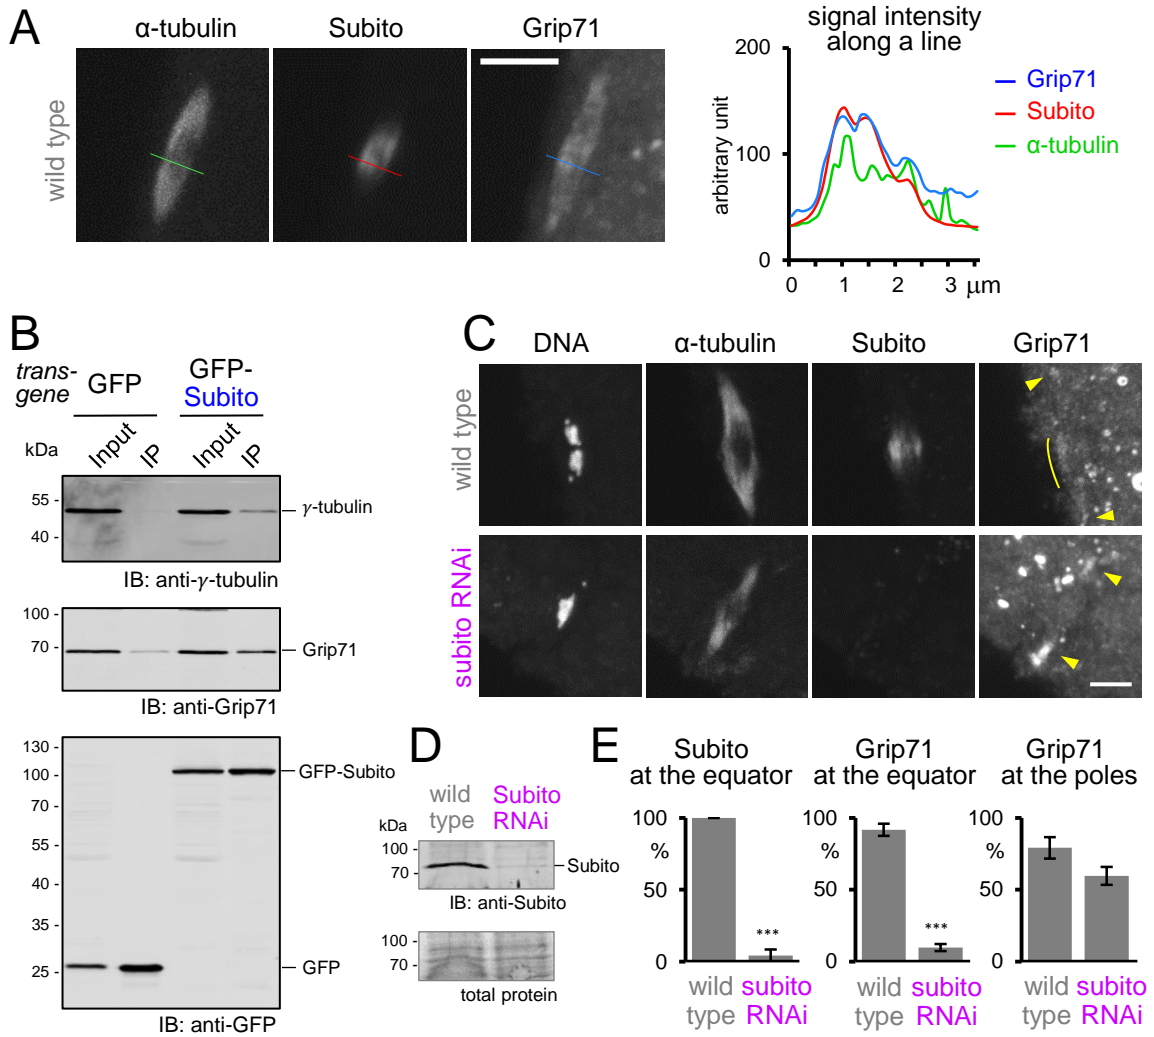

Figure 2



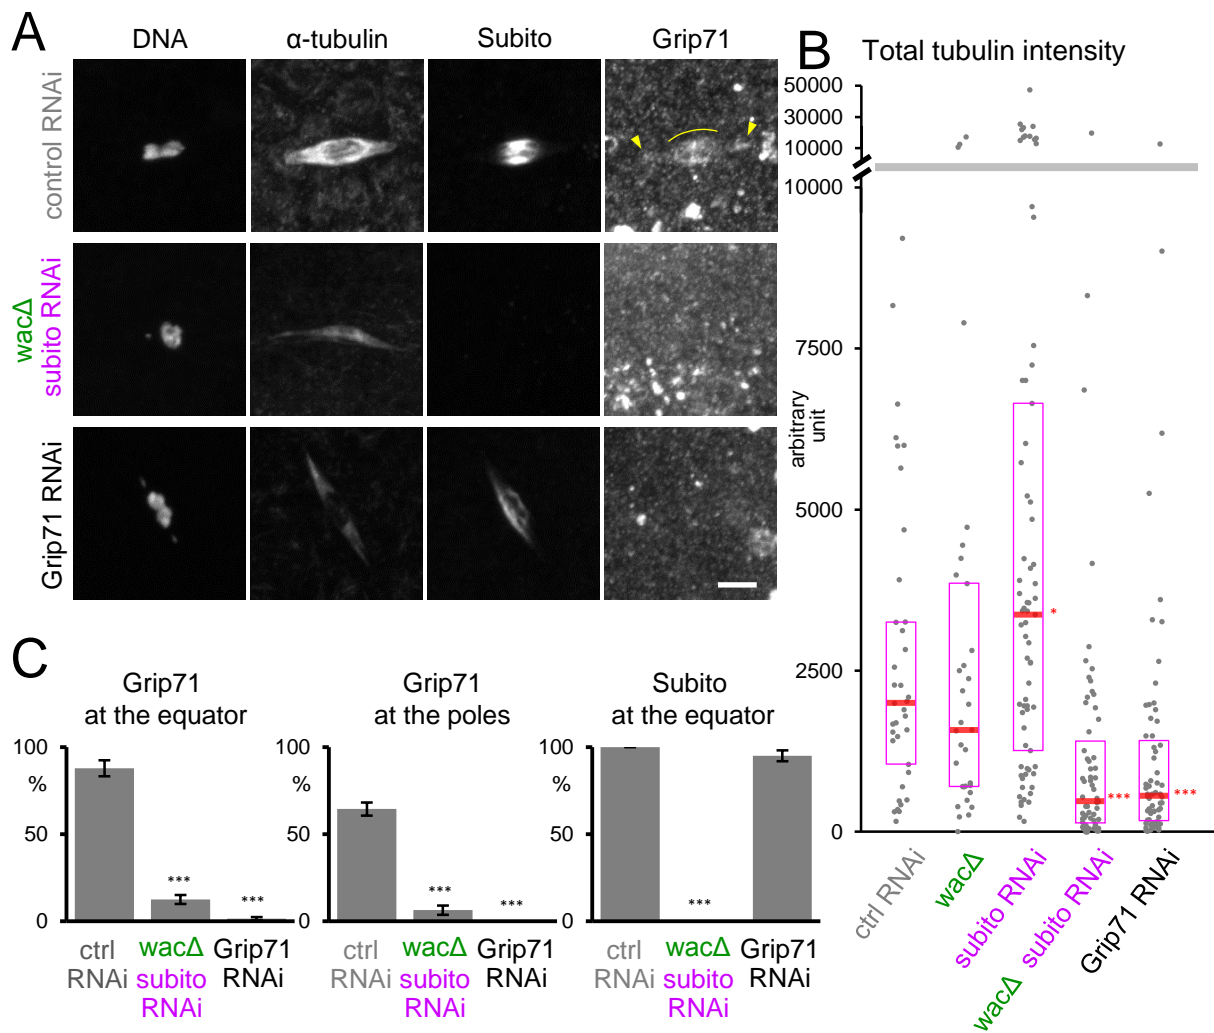

Figure 3

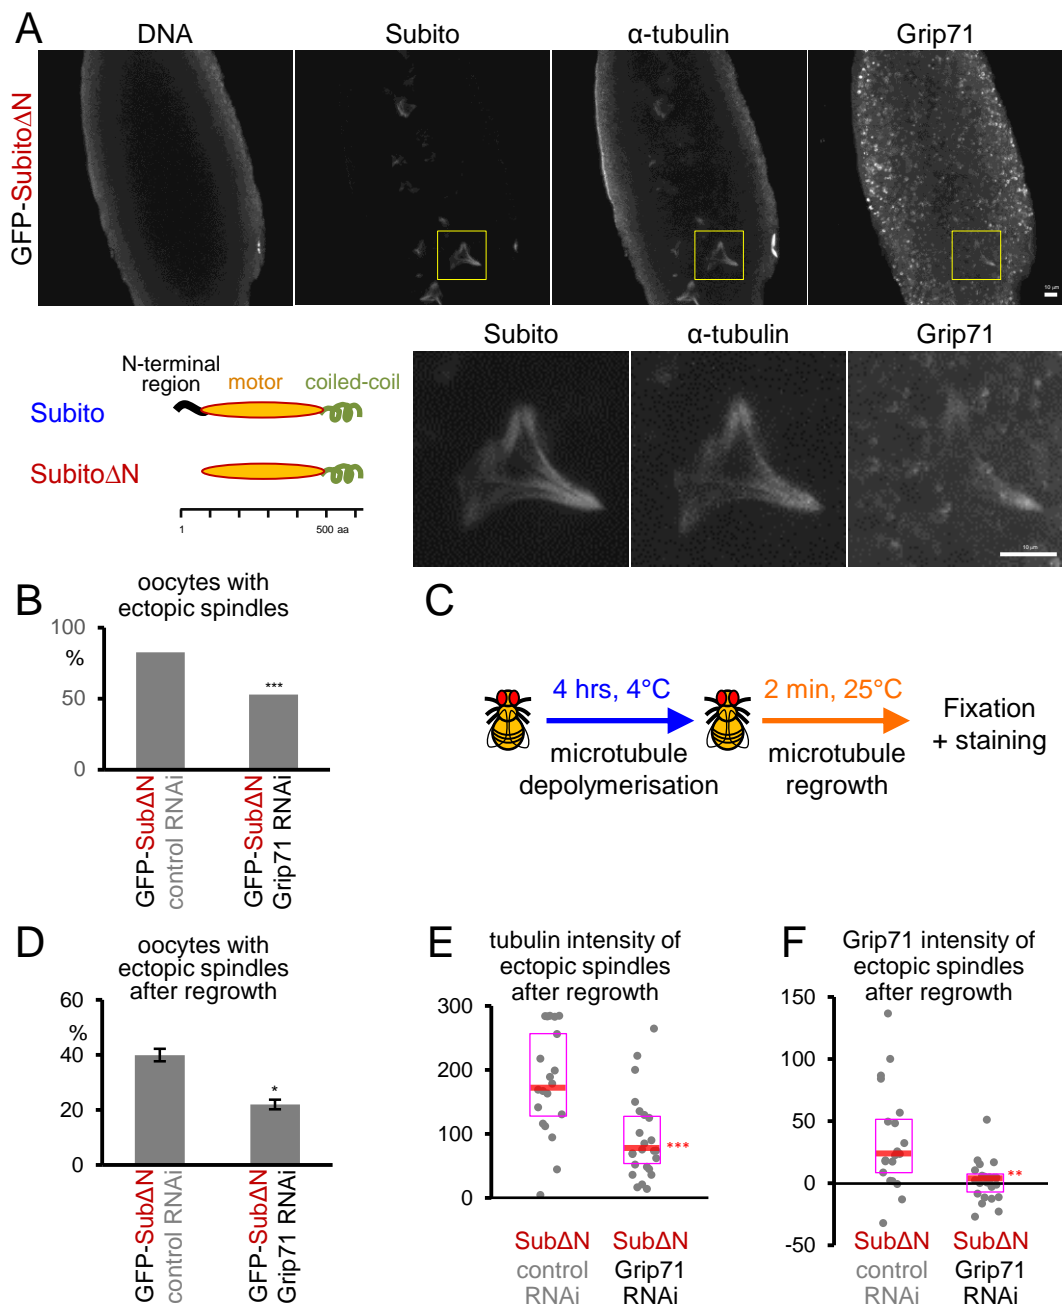

Figure 4

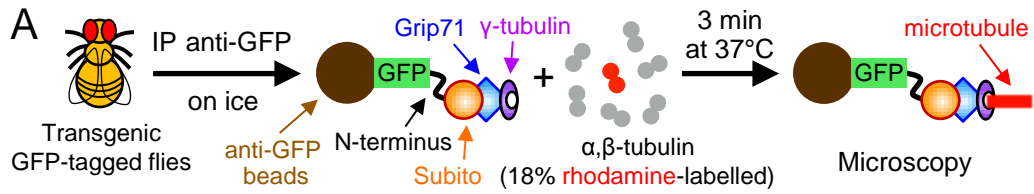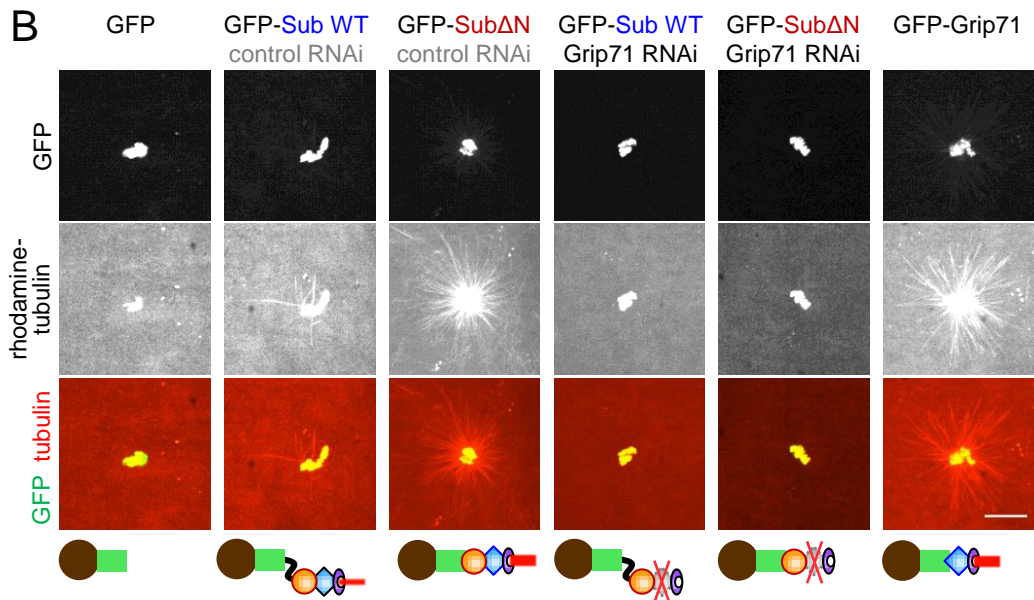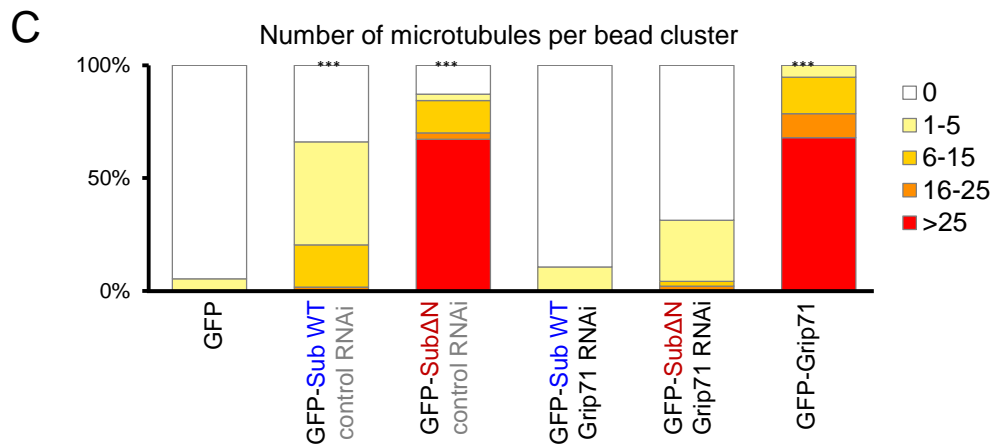

Figure 5

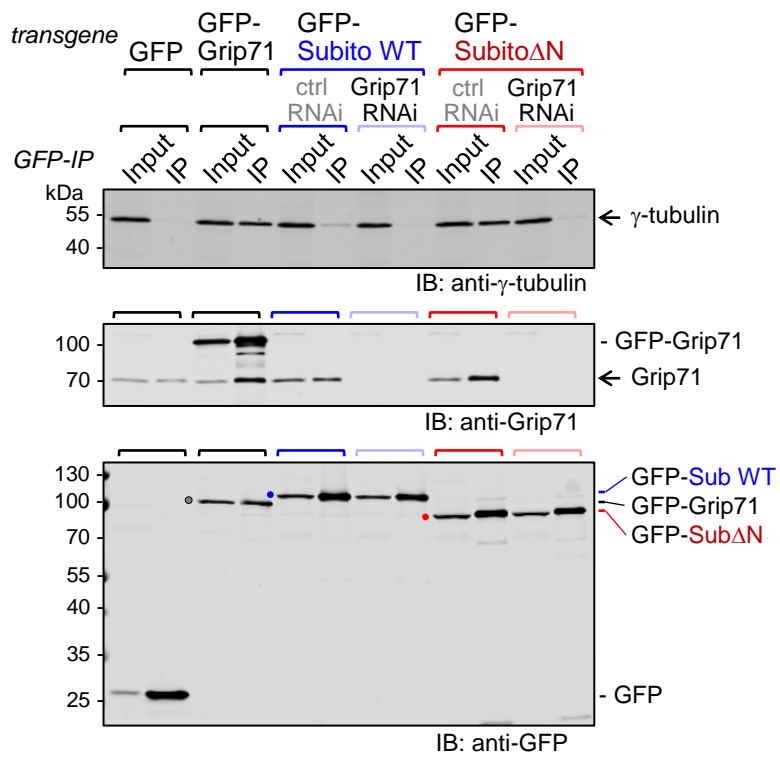

Figure 6

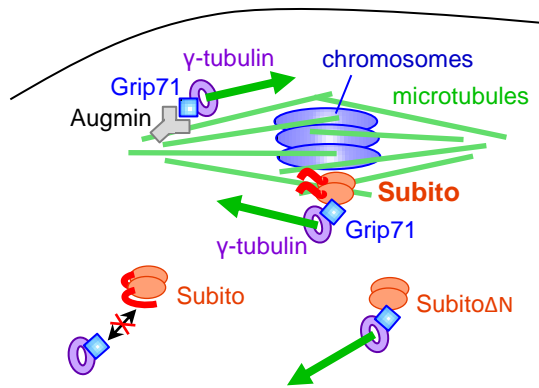

Figure 7

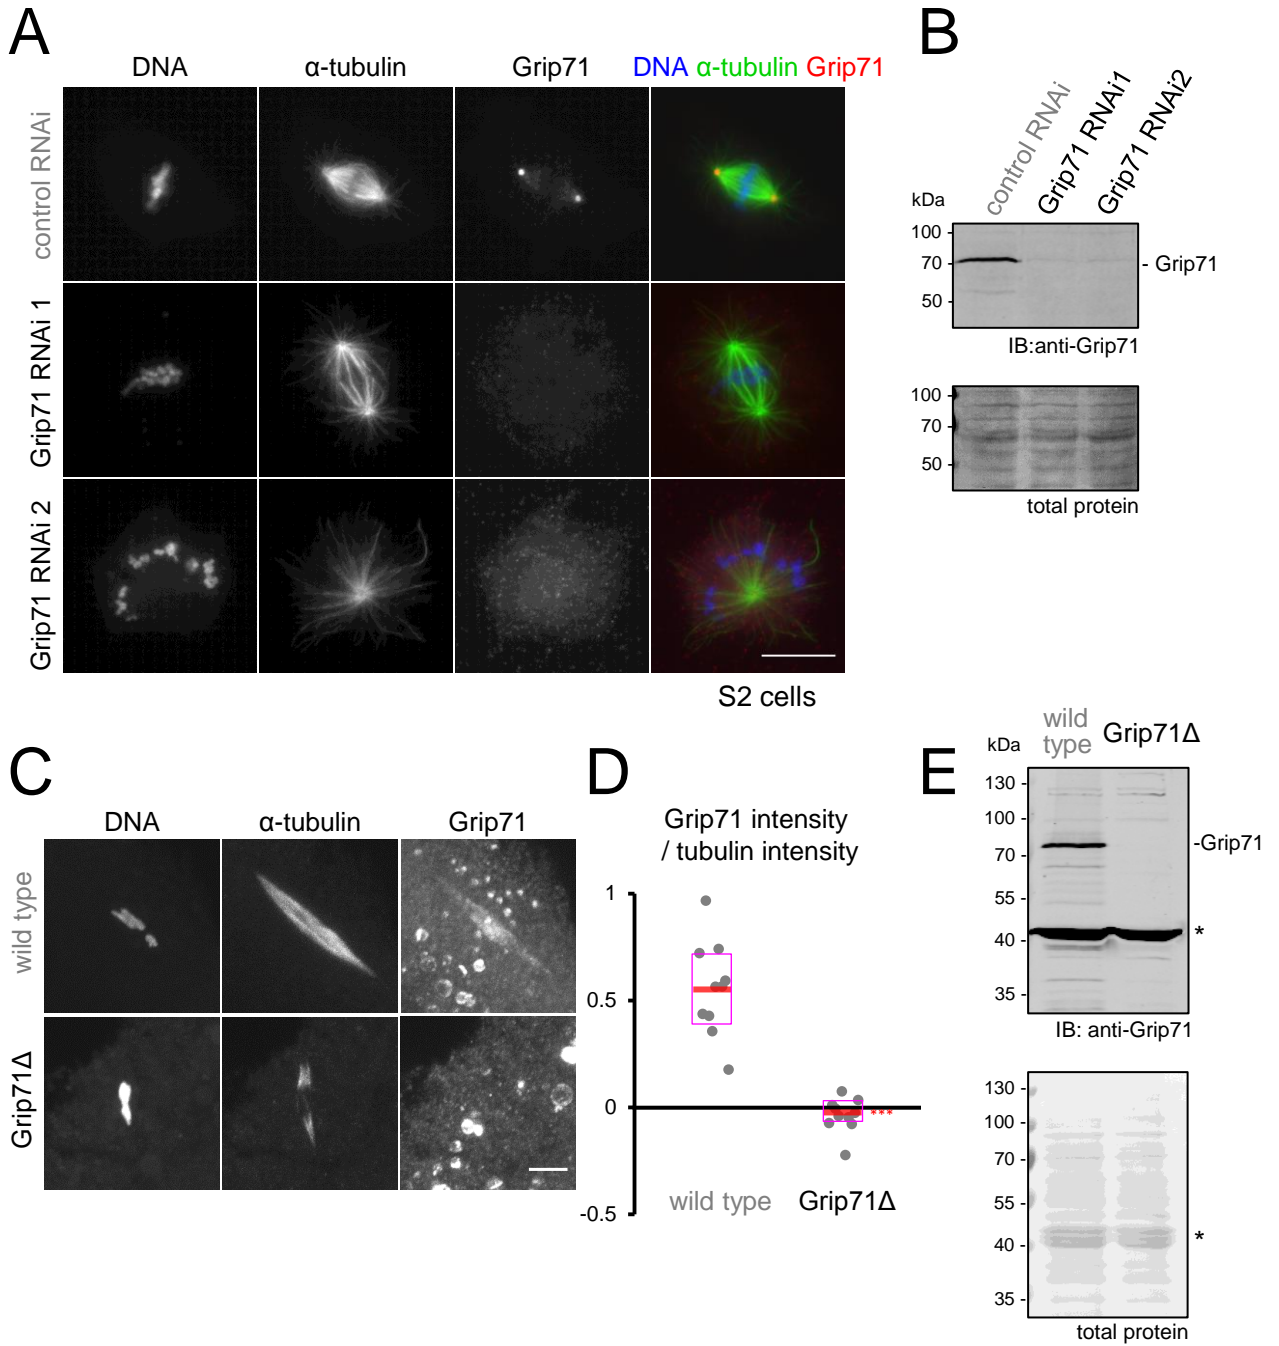

Figure S1

Number of free microtubules per field

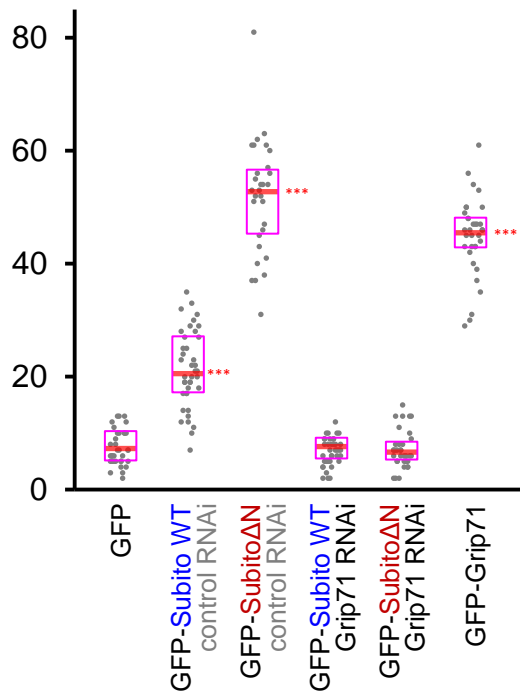

Figure S2
